# Supplementary material
Source: PubMed Central journal article supplement (PMC4326662)

### Main model

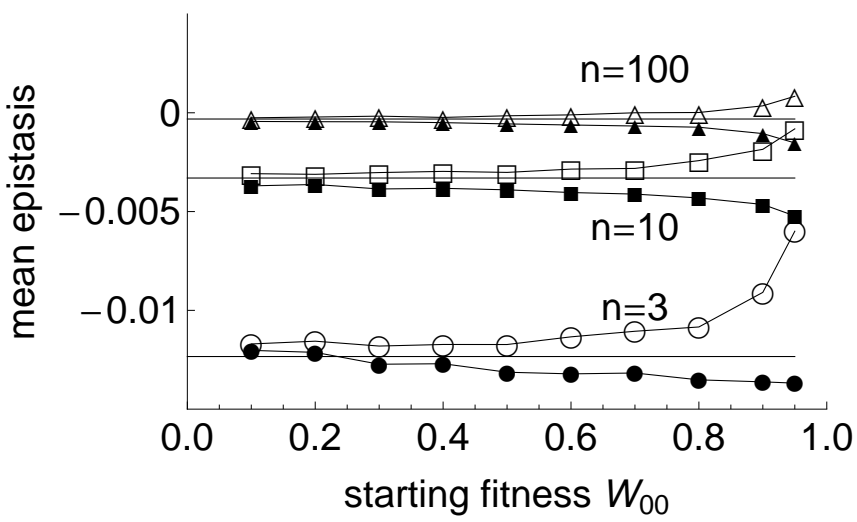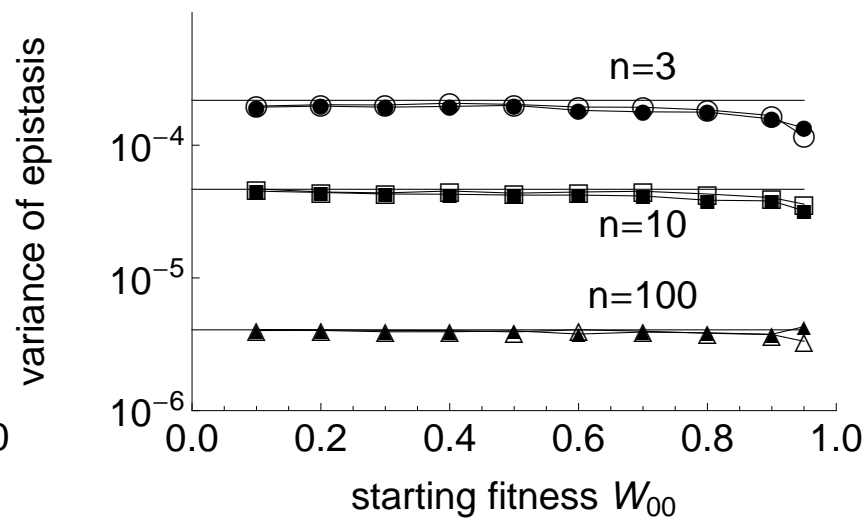

### No scaling between $\sigma_{mut}$ and $n$

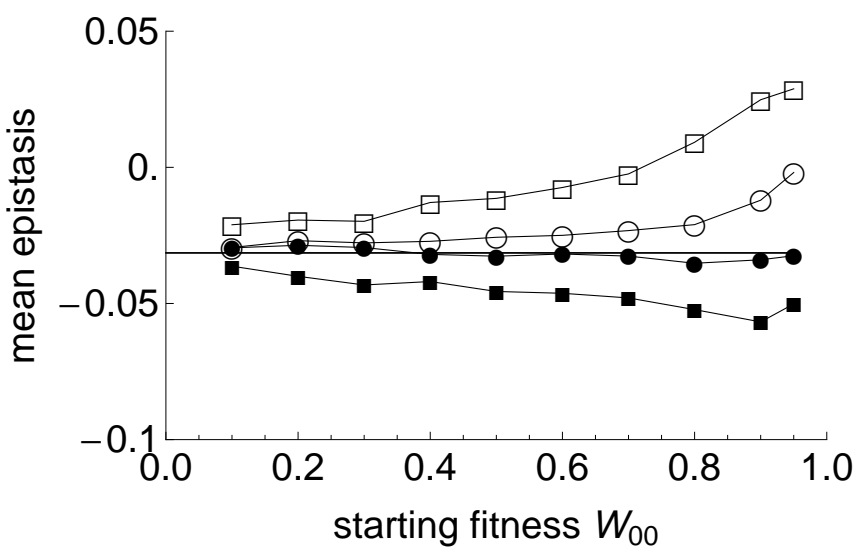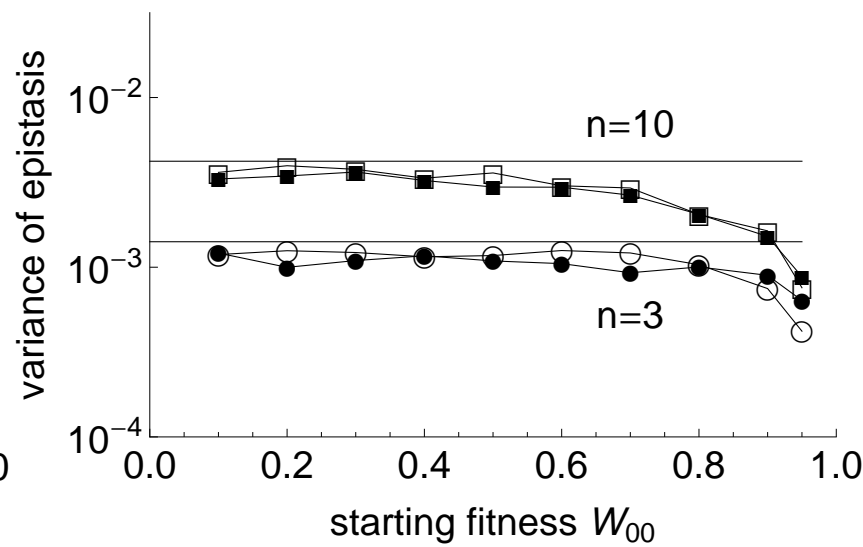

### Heterogeneity in selection, maladaptation on first axis

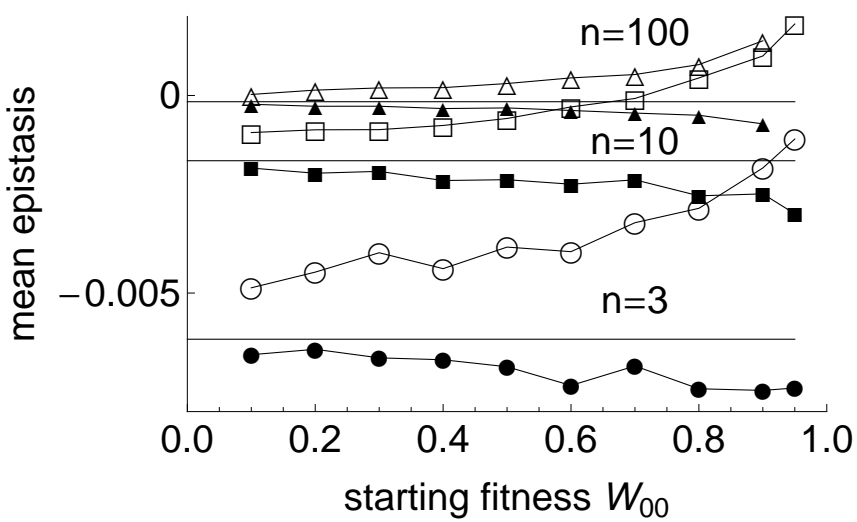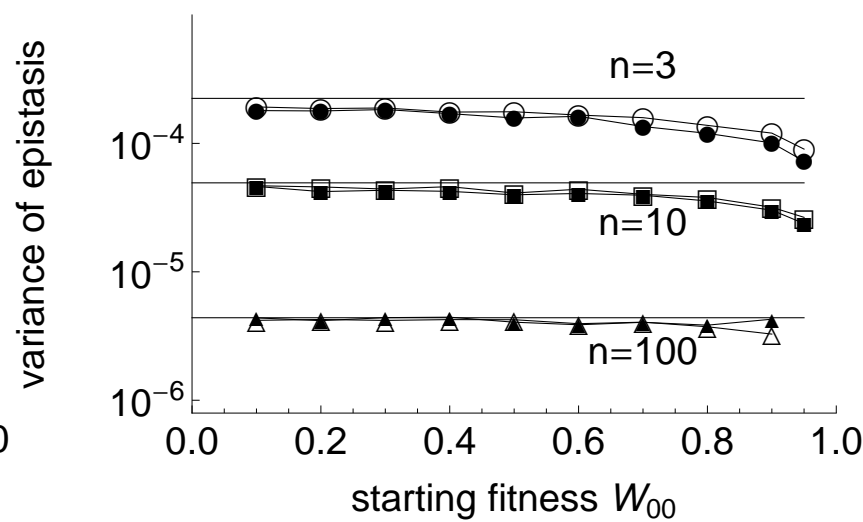

### Heterogeneity in selection, maladaptation on all axes

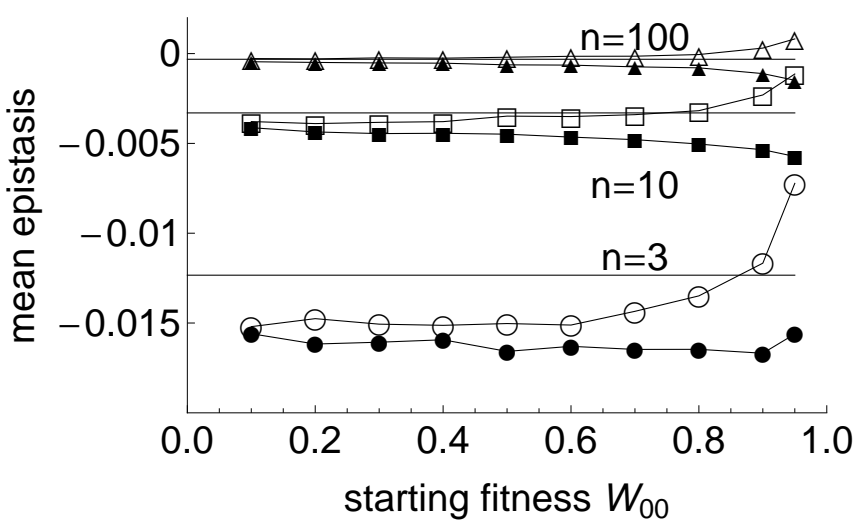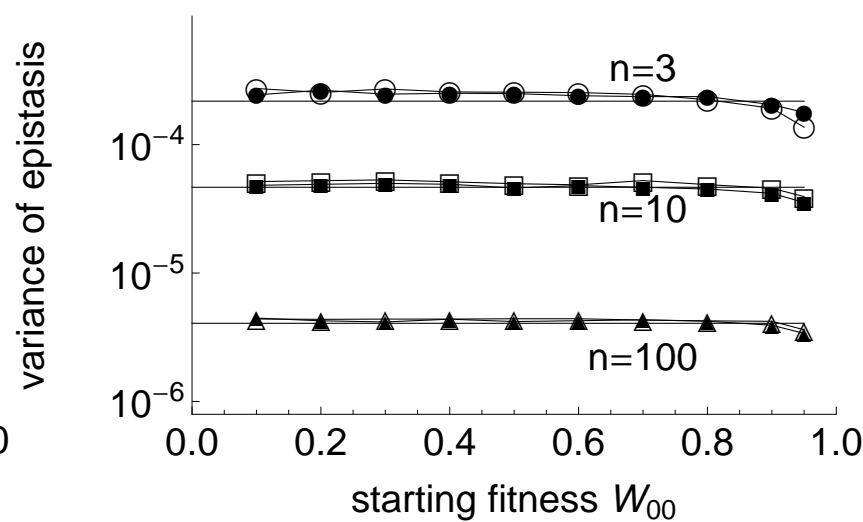

Supplement: NIHMS61489-supplement-S1.pdf [file NIHMS61489-supplement-S1.pdf]
